# Supplementary material for: MicroRNA-4500 Inhibits Migration, Invasion, and Angiogenesis of Breast Cancer Cells via RRM2-Dependent MAPK Signaling Pathway
Source: PubMed Central journal article supplement (PMC7330432; doi:10.1016/j.omtn.2020.04.018), 2020-05-04
Supplement: mmc1.pdf [file mmc1.pdf]

OMTN, Volume 21

## **Supplemental Information**

### **MicroRNA-4500 Inhibits Migration, Invasion, and Angiogenesis of Breast Cancer Cells via RRM2-Dependent MAPK Signaling Pathway**

**Shaoying Li, Huifen Mai, Yefeng Zhu, Guofeng Li, Jing Sun, Guisen Li, Bichan Liang, and Shaojun Chen**

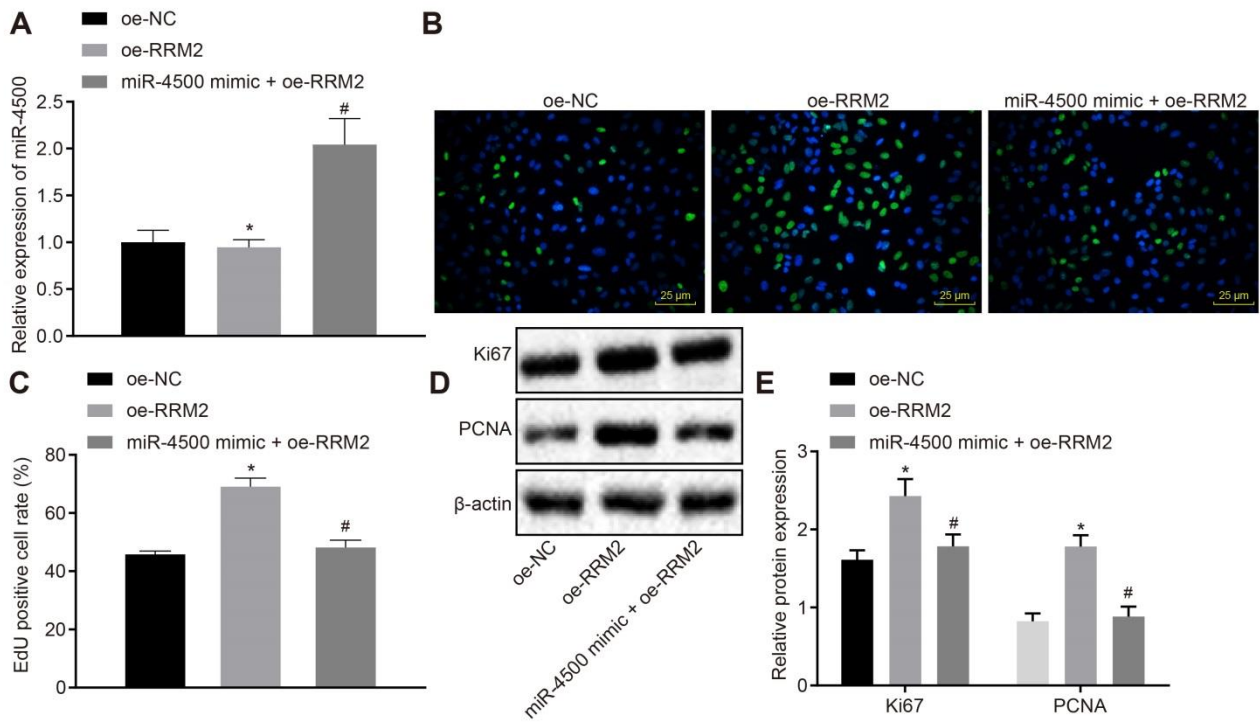

**Supplementary Figure 1. Over-expressed RRM2 promotes proliferation of breast cancer cells, which is abrogated by up-regulated miR-4500.**

A, The expression patterns of miR-4500 determined by RT-qPCR. B, The cell proliferation detected by EdU proliferation assay (400 ×). C, The quantitative analysis for EdU positive breast cancer cells detected by EdU proliferation assay. D, The protein bands of RRM2 and cell proliferation-related factors Ki67 and PCNA in each group detected by Western blot analysis. D, The RRM2 and cell proliferation-related factors Ki67 and PCNA protein expression patterns in each group detected by Western blot analysis. \*, # respectively indicate that  $p < 0.05$  vs. the oe-NC group and oe-RRM2 group. The data comparisons were analyzed by one-way ANOVA and the experiment was repeated three times independently.

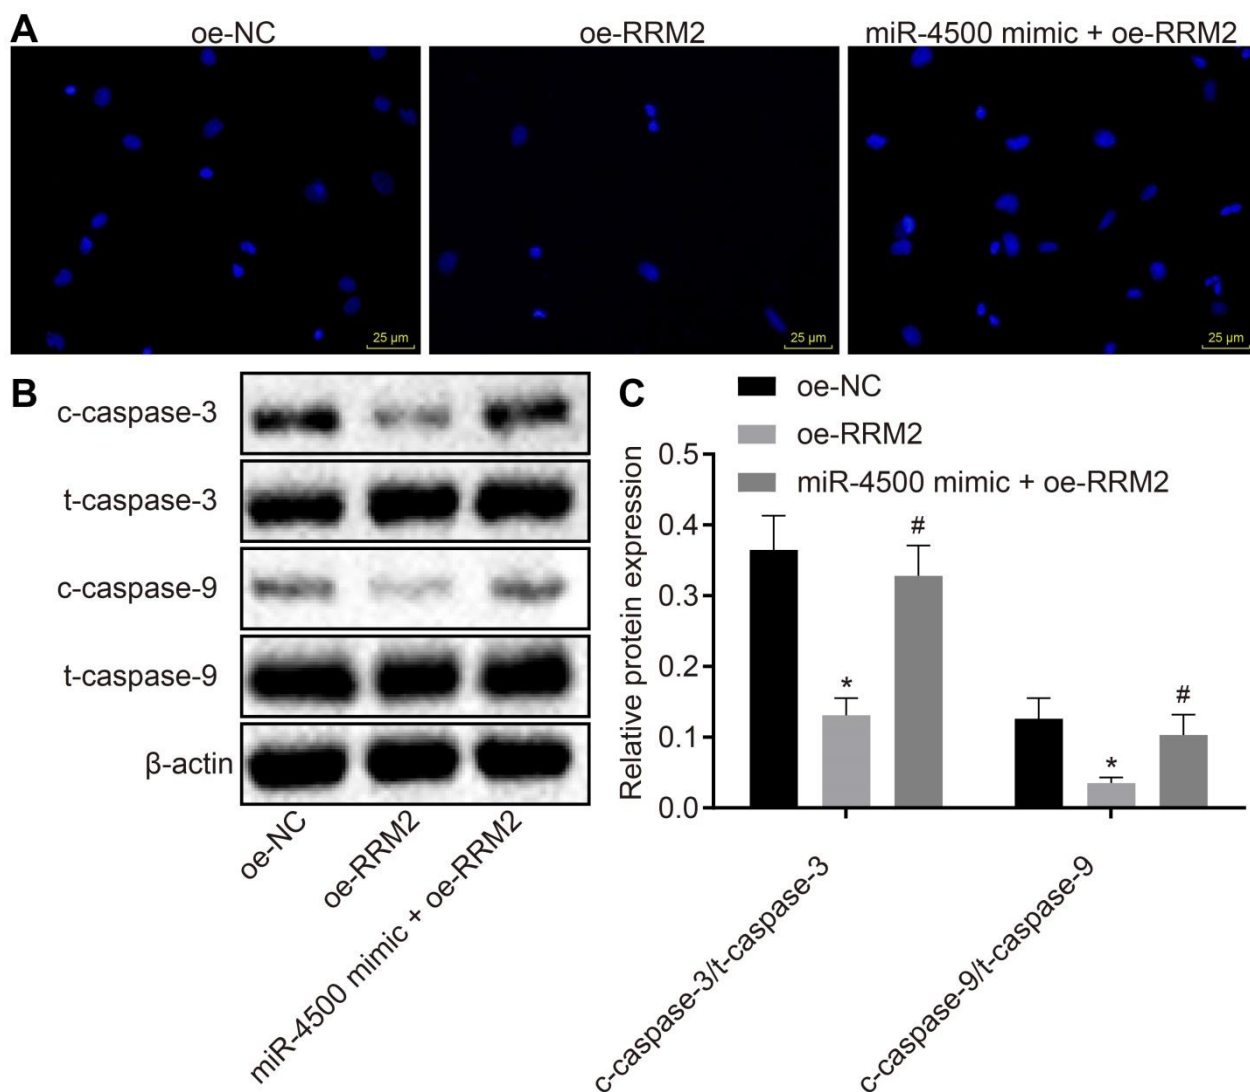

**Supplementary Figure 2. Over-expressed RRM2 inhibits apoptosis of breast cancer cells, which is abrogated by up-regulated miR-4500.**

A, The cell apoptosis detected by Hoechst staining (400 ×). B, The protein bands of cell apoptosis-related factors c-Caspase-3/t-Caspase-3 and c-Caspase-9/t-Caspase-9 detected by Western blot analysis. C, The protein expression patterns of cell apoptosis-related factors c-Caspase-3/t-Caspase-3 and c-Caspase-9/t-Caspase-9 in each group detected by Western blot analysis; \*, # respectively indicate that  $p < 0.05$  vs. the oe-NC group and oe-RRM2 group. The data comparisons were analyzed by one-way ANOVA and the experiment was repeated three times independently.

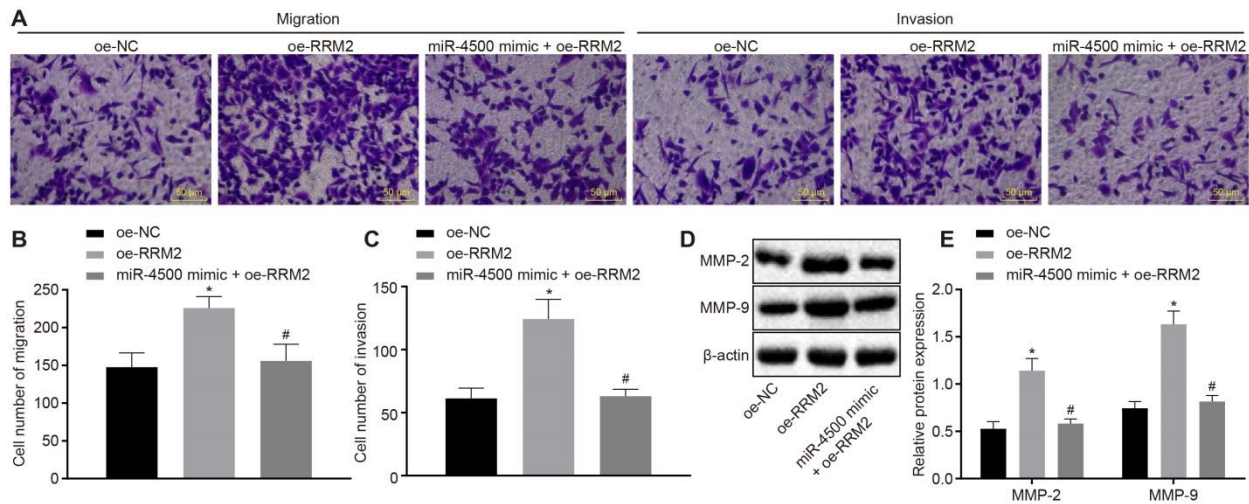

**Supplementary Figure 3. Over-expressed RRM2 promotes migration and invasion of breast cancer cells, which is abrogated by up-regulated miR-4500.**

A, The migration and invasion of breast cancer cells in each group under the microscope (200 ×). B, The cell migration in each group detected by Transwell assay. C, The cell invasion in each group detected by Transwell assay. D and E, The protein expression patterns of RRM2, MMP-2 and MMP-9 in each group detected by Western blot analysis. \*, # respectively indicate that  $p < 0.05$  vs. the oe-NC group and oe-RRM2 group. The data comparisons were analyzed by one-way ANOVA and the experiment was repeated three times independently.

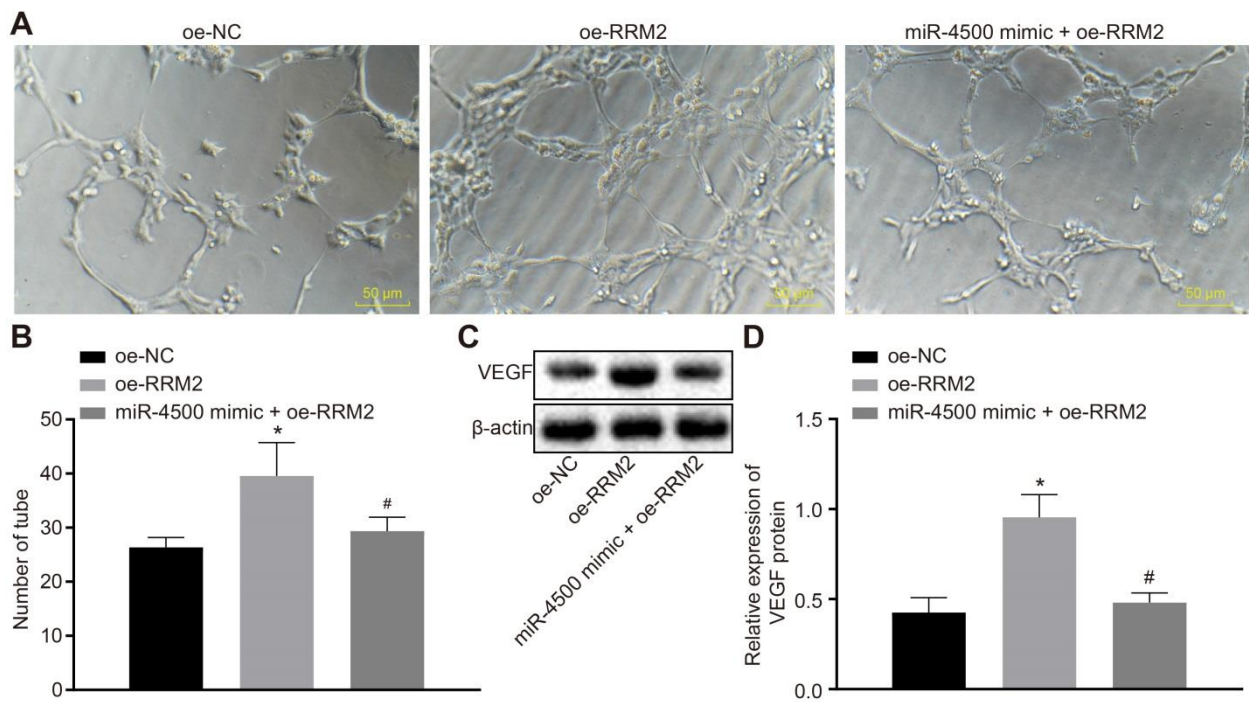

**Supplementary Figure 4. Over-expressed RRM2 promotes the capillary-like tube formation of endothelial cells and angiogenesis of breast cancer cells, which is abrogated by up-regulated miR-4500.**

A and B, Capillary-like tube formation observed under a microscope by *in vitro* assay (200  $\times$ ). C and D, The protein expressions of tumor angiogenic factor VEGF detected by Western blot analysis. \*, # indicate that  $p < 0.05$  respectively vs. the oe-NC group and oe-RRM2 group. The data comparisons were analyzed by one-way ANOVA and the experiment was repeated three times independently.
